# Supplementary material for: Toward more sustainable enzyme reactions: enhancing kinetics by polydimethylacrylamide implementation
Source: Royal Society of Chemistry journal article supplement (doi:10.1039/d3gc04688e), 2023-12-21
Supplement: d3gc04688e1.pdf [file d3gc04688e1.pdf]

## Supplementary Information

### Toward more Sustainable Enzyme Reactions: Enhancing Kinetics by Polydimethylacrylamide Implementation

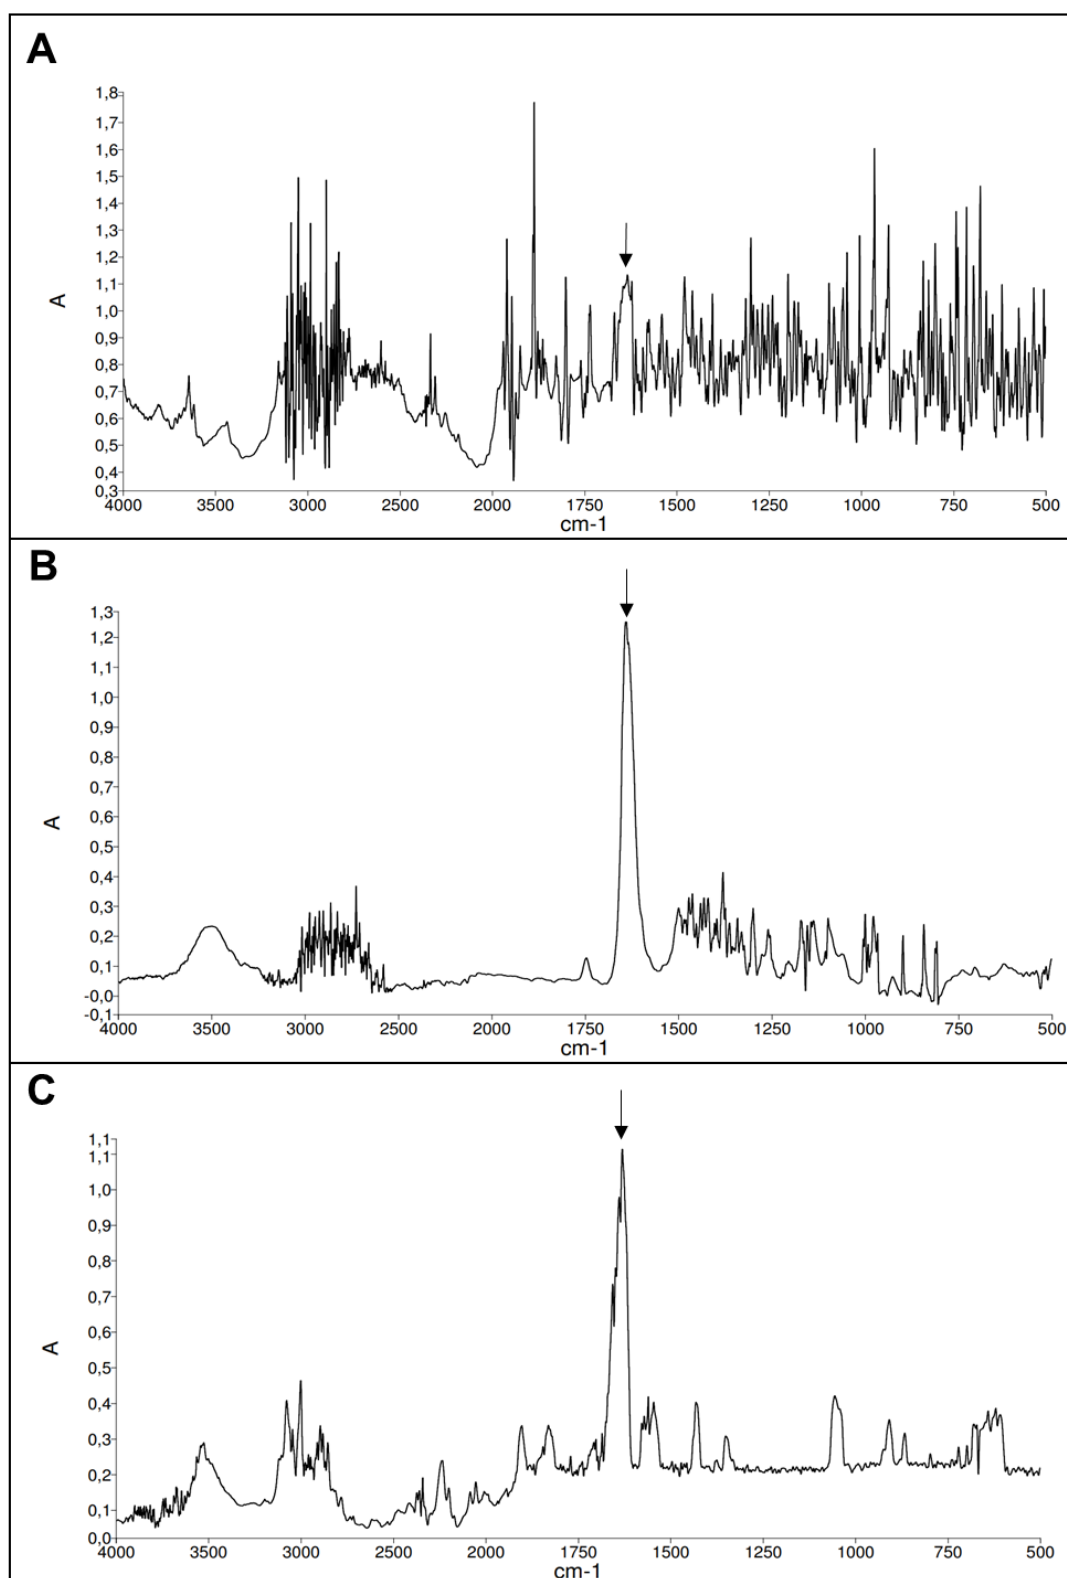

**Figure S1** Recorded Fourier transform-infrared spectra of PDMA-functionalized microwell plates. Spectra of the PDMA coatings on (A) polystyrene, (B) polypropylene and (C) polycarbonate were recorded in the range of 4000 – 400  $\text{cm}^{-1}$ . The expected PDMA-amides can be seen clearly at 1650  $\text{cm}^{-1}$  (relevant peak marked with arrows). In addition, the dominant peaks between 3000 – 3500  $\text{cm}^{-1}$  can be assigned to the PDMA. Thus, the recorded Fourier transform-infrared spectra proved the presence of PDMA on the microtiter plates.

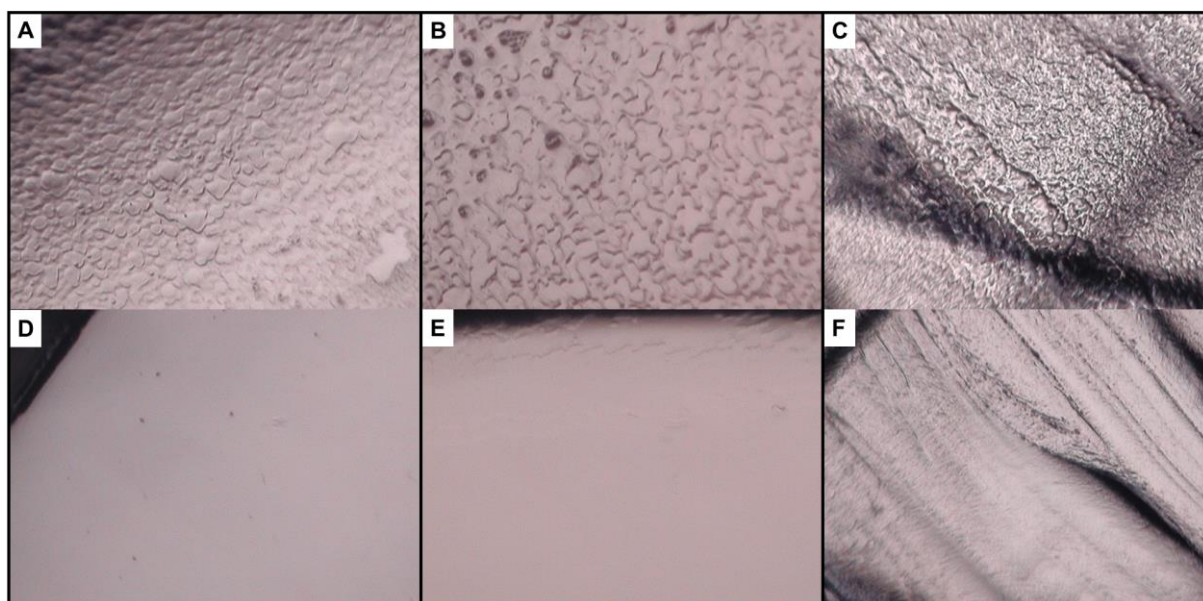

**Figure S2 FTIR-Microscope images of PDMA functionalized microwell plates.** Images of (A) polystyrene (B) polypropylene and (C) polycarbonate functionalized with PDMA as well as non-functionalized (D) polystyrene, (E) polypropylene and (F) polycarbonate were captured with a Spotlight 400 FT-IR microscope (PerkinElmer, Waltham, USA). Plane surfaces can be seen for unfunctionalized PS (D) and PP (E) and a slightly structured surface for unfunctionalized PC (F) originating from the 3D printing. The functionalization of the different polymers with PDMA results in smooth, wavy textured surfaces.

**Table S1 Nitrocefin substrate turnover ( $\mu\text{M}$ ) of TEM-1  $\beta$ -lactamase with varied concentrations of nitrocefin substrate after 60 minutes incubation.** Experiments were performed in polystyrene wells functionalized with PDMA and non-functionalized (control). Substrate turnover was measured with a TECAN Infinite 200 Pro at 492 nm. The amounts of substrates converted by the enzyme were determined from the measured absorbance values and the corresponding extinction coefficient of  $17,400 \text{ M}^{-1} \text{ cm}^{-1}$ . Each data point represents the mean  $\pm$  SD of three different experiments.

|              | Nitrocefin [ $\mu\text{M}$ ] |      |         |       | p-value |
|--------------|------------------------------|------|---------|-------|---------|
|              | PDMA                         |      | control |       |         |
|              | Mean                         | SD   | Mean    | SD    |         |
| <b>750</b>   | 349.29                       | 6.02 | 195.56  | 15.59 | 0.0061  |
| <b>500</b>   | 316.88                       | 7.33 | 176.38  | 3.44  | 0.0019  |
| <b>250</b>   | 224.27                       | 9.48 | 102.38  | 3.88  | 0.0021  |
| <b>125</b>   | 104.23                       | 1.95 | 52.59   | 3.09  | 0.0002  |
| <b>62.5</b>  | 50.04                        | 1.42 | 33.49   | 1.11  | 0.0022  |
| <b>31.25</b> | 25.27                        | 0.40 | 18.20   | 0.52  | 0.0022  |
| <b>0</b>     | 0.00                         | 0.00 | 0.00    | 0.00  |         |

**Table S2 TMB substrate turnover ( $\mu\text{M}$ ) of HRP with varied concentrations of TMB substrate after 60 minutes incubation.** Experiments were performed in polystyrene wells functionalized with PDMA and non-functionalized (control). Substrate turnover was measured with a TECAN Infinite 200 Pro at 650 nm. The amounts of substrates converted by the enzyme were determined from the measured absorbance values and the corresponding extinction coefficient of  $39,000 \text{ M}^{-1} \text{ cm}^{-1}$ . Each data point represents the mean  $\pm$  SD of three different experiments.

|               | TMB [ $\mu\text{M}$ ] |      |         |      | p-value |
|---------------|-----------------------|------|---------|------|---------|
|               | PDMA                  |      | control |      |         |
|               | Mean                  | SD   | Mean    | SD   |         |
| <b>117.9</b>  | 27.09                 | 0.37 | 19.73   | 0.85 | 0.0067  |
| <b>99.46</b>  | 26.99                 | 0.13 | 20.95   | 2.33 | 0.0456  |
| <b>88.69</b>  | 21.64                 | 1.22 | 21.74   | 0.26 | 0.8906  |
| <b>81.58</b>  | 21.71                 | 1.27 | 21.16   | 0.59 | 0.5967  |
| <b>74.48</b>  | 19.13                 | 0.14 | 19.56   | 0.57 | 0.3848  |
| <b>67.375</b> | 18.94                 | 0.70 | 19.77   | 0.58 | 0.1445  |

**Table S3 PNPP substrate turnover ( $\mu\text{M}$ ) of ALP with varied concentrations of pNPP substrate after 60 minutes incubation. Experiments were performed in polystyrene wells functionalized with PDMA and non-functionalized (control). Substrate turnover was measured with a TECAN Infinite 200 Pro at 405 nm. The amounts of substrates converted by the enzyme were determined from the measured absorbance values and the corresponding extinction coefficient of  $18,000 \text{ M}^{-1} \text{ cm}^{-1}$ . Each data point represents the mean  $\pm$  SD of three different experiments.**

|              | pNPP [ $\mu\text{M}$ ] |       |         |      | p-value |
|--------------|------------------------|-------|---------|------|---------|
|              | PDMA                   |       | control |      |         |
|              | Mean                   | SD    | Mean    | SD   |         |
| <b>1,000</b> | 140.82                 | 18.68 | 46.25   | 9.40 | 0.0279  |
| <b>500</b>   | 67.55                  | 10.13 | 22.33   | 1.62 | 0.0205  |
| <b>250</b>   | 37.28                  | 2.67  | 17.39   | 0.80 | 0.0100  |
| <b>125</b>   | 22.81                  | 0.99  | 12.77   | 0.47 | 0.0069  |
| <b>100</b>   | 20.29                  | 1.00  | 11.85   | 0.20 | 0.0030  |
| <b>62.5</b>  | 17.31                  | 1.30  | 12.54   | 0.87 | 0.0391  |
| <b>0</b>     | 0.00                   | 0.00  | 0.00    | 0.00 |         |

**Table S4 Absorbance values of nitrocefin substrate turnover by TEM-1  $\beta$ -lactamase in polystyrene microtiter plate wells functionalized with different amounts of PDMA. Substrate turnover was measured with a TECAN Infinite 200 Pro at 492 nm. Each data point represents the mean  $\pm$  SD of three different experiments.**

| PDMA [ $\mu\text{g}$ ] | Mean  | SD    |
|------------------------|-------|-------|
| <b>400</b>             | 0.840 | 0.018 |
| <b>350</b>             | 0.828 | 0.007 |
| <b>300</b>             | 0.761 | 0.037 |
| <b>250</b>             | 0.767 | 0.016 |
| <b>200</b>             | 0.741 | 0.016 |
| <b>150</b>             | 0.666 | 0.021 |
| <b>100</b>             | 0.609 | 0.079 |
| <b>50</b>              | 0.444 | 0.006 |
| <b>0</b>               | 0.379 | 0.007 |

**Table S5 Absorbance values of TMB substrate turnover by HRP in polystyrene microtiter plate wells functionalized with different amounts of PDMA. Substrate turnover was measured with a TECAN Infinite 200 Pro at 650 nm. Each data point represents the mean  $\pm$  SD of three different experiments.**

| PDMA [ $\mu\text{g}$ ] | Mean  | SD    |
|------------------------|-------|-------|
| <b>800</b>             | 1.416 | 0.029 |
| <b>700</b>             | 1.376 | 0.020 |
| <b>600</b>             | 1.354 | 0.035 |
| <b>500</b>             | 1.339 | 0.013 |
| <b>400</b>             | 1.303 | 0.024 |
| <b>300</b>             | 1.316 | 0.024 |
| <b>200</b>             | 1.267 | 0.006 |
| <b>100</b>             | 1.226 | 0.029 |
| <b>0</b>               | 1.069 | 0.004 |

**Table S6 Absorbance values of pNPP substrate turnover by ALP in polystyrene microtiter plate wells functionalized with different amounts of PDMA. Substrate turnover was measured with a TECAN Infinite 200 Pro at 405 nm. Each data point represents the mean  $\pm$  SD of three different experiments.**

| PDMA [ $\mu$ g] | Mean  | SD    |
|-----------------|-------|-------|
| 400             | 0.639 | 0.042 |
| 350             | 0.619 | 0.063 |
| 300             | 0.530 | 0.072 |
| 250             | 0.505 | 0.075 |
| 200             | 0.450 | 0.031 |
| 150             | 0.344 | 0.053 |
| 100             | 0.256 | 0.043 |
| 50              | 0.183 | 0.053 |
| 25              | 0.181 | 0.014 |
| 12.5            | 0.193 | 0.023 |
| 0               | 0.158 | 0.013 |

**Table S7 Initial reaction rates of nitrocefin substrate turnover by TEM-1  $\beta$ -lactamase in polystyrene microtiter plate wells. Substrate turnover was monitored as absorbance increase with a TECAN Infinite 200 Pro at 492 nm in 10 second intervals. Initial reaction rates were calculated from the linear range of substrate turnover at different substrate concentrations. Each data point represents the mean  $\pm$  SD of three different experiments.**

| Nitrocefin [ $\mu$ M] | $V_0$      |       |         |       | p-value |
|-----------------------|------------|-------|---------|-------|---------|
|                       | PDMA on PS |       | control |       |         |
|                       | Mean       | SD    | Mean    | SD    |         |
| 600                   | 3.308      | 0.074 | 1.753   | 0.220 | 0.0108  |
| 400                   | 3.418      | 0.037 | 1.733   | 0.037 | 0.0006  |
| 200                   | 3.101      | 0.016 | 1.319   | 0.032 | 0.0002  |
| 100                   | 2.240      | 0.032 | 0.953   | 0.072 | 0.0006  |
| 50                    | 1.402      | 0.072 | 0.756   | 0.047 | 0.0030  |
| 25                    | 0.911      | 0.018 | 0.415   | 0.007 | 0.0005  |
| 0                     | 0.000      | 0.000 | 0.000   | 0.000 |         |

**Table S8 Initial reaction rates of TMB substrate turnover by HRP in polystyrene microtiter plate wells. Substrate turnover was monitored as absorbance increase with a TECAN Infinite 200 Pro at 650 nm in 15 second intervals. Initial reaction rates were calculated from the linear range of substrate turnover at different substrate concentrations. Each data point represents the mean  $\pm$  SD of three different experiments.**

| TMB [ $\mu$ M] | $V_0$      |       |         |       | p-value |
|----------------|------------|-------|---------|-------|---------|
|                | PDMA on PS |       | control |       |         |
|                | Mean       | SD    | Mean    | SD    |         |
| 117.9          | 0.952      | 0.005 | 0.670   | 0.038 | 0.0059  |
| 99.46          | 0.861      | 0.007 | 0.674   | 0.057 | 0.0270  |
| 88.69          | 0.697      | 0.039 | 0.686   | 0.004 | 0.6796  |
| 81.58          | 0.668      | 0.029 | 0.643   | 0.015 | 0.3232  |
| 74.48          | 0.572      | 0.016 | 0.574   | 0.014 | 0.9104  |
| 67.375         | 0.553      | 0.025 | 0.561   | 0.017 | 0.7522  |

**Table S9 Initial reaction rates of pNPP substrate turnover by ALP in polystyrene microtiter plate wells.** Substrate turnover was monitored as absorbance increase with a TECAN Infinite 200 Pro at 405 nm in 10 second intervals. Initial reaction rates were calculated from the linear range of substrate turnover at different substrate concentrations. Each data point represents the mean  $\pm$  SD of three different experiments.

| pNPP [ $\mu$ M] | $V_0$      |       |         |       | p-value |
|-----------------|------------|-------|---------|-------|---------|
|                 | PDMA on PS |       | control |       |         |
|                 | Mean       | SD    | Mean    | SD    |         |
| 500             | 0.229      | 0.021 | 0.068   | 0.005 | 0.0085  |
| 250             | 0.140      | 0.007 | 0.051   | 0.003 | 0.0040  |
| 125             | 0.081      | 0.002 | 0.018   | 0.005 | 0.0041  |
| 100             | 0.063      | 0.007 | 0.012   | 0.002 | 0.0104  |
| 62.5            | 0.044      | 0.006 | 0.016   | 0.002 | 0.0105  |
| 0               | 0.000      | 0.000 | 0.000   | 0.000 |         |

**Table S10 Nitrocefin substrate turnover ( $\mu$ M) of TEM-1  $\beta$ -lactamase with varied concentrations of nitrocefin substrate after 60 minutes incubation.** Experiments were performed in polypropylene wells functionalized with PDMA and non-functionalized (control). Substrate turnover was measured with a TECAN Infinite 200 Pro at 492 nm. The amounts of substrates converted by the enzyme were determined from the measured absorbance values and the corresponding extinction coefficient of  $17,400 \text{ M}^{-1} \text{ cm}^{-1}$ . Each data point represents the mean  $\pm$  SD of three different experiments.

| Nitrocefin [ $\mu$ M] | $V_0$      |       |         |       | p-value |
|-----------------------|------------|-------|---------|-------|---------|
|                       | PDMA on PP |       | control |       |         |
|                       | Mean       | SD    | Mean    | SD    |         |
| 750                   | 385.33     | 56.25 | 193.43  | 13.21 | 0.0206  |
| 625                   | 411.77     | 36.80 | 163.33  | 29.36 | 0.0151  |
| 500                   | 330.98     | 30.66 | 132.16  | 6.21  | 0.0113  |
| 375                   | 281.39     | 12.14 | 125.33  | 10.24 | 0.0040  |
| 250                   | 195.57     | 13.39 | 90.00   | 0.30  | 0.0051  |
| 125                   | 115.95     | 9.85  | 65.10   | 8.52  | 0.0369  |
| 62.5                  | 60.55      | 6.16  | 48.93   | 4.04  |         |
| 0                     | 0.000      | 0.000 | 0.000   | 0.000 |         |

**Table S11 Nitrocefin substrate turnover ( $\mu$ M) of TEM-1  $\beta$ -lactamase with varied concentrations of nitrocefin substrate after 60 minutes incubation.** Experiments were performed in polypropylene wells functionalized with PDMA and non-functionalized (control). Substrate turnover was measured with a TECAN Infinite 200 Pro at 492 nm. The amounts of substrates converted by the enzyme were determined from the measured absorbance values and the corresponding extinction coefficient of  $17,400 \text{ M}^{-1} \text{ cm}^{-1}$ . Each data point represents the mean  $\pm$  SD of three different experiments.

| Nitrocefin [ $\mu$ M] | $V_0$      |       |         |       | p-value |
|-----------------------|------------|-------|---------|-------|---------|
|                       | PDMA on PC |       | control |       |         |
|                       | Mean       | SD    | Mean    | SD    |         |
| 750                   | 277.35     | 34.79 | 80.59   | 18.12 | 0.0139  |
| 625                   | 238.95     | 4.23  | 81.76   | 8.65  | 0.0021  |
| 500                   | 207.05     | 9.21  | 49.72   | 6.47  | 0.0032  |
| 375                   | 168.37     | 5.73  | 49.47   | 5.56  | 0.0010  |
| 250                   | 129.38     | 10.97 | 42.86   | 4.89  | 0.0032  |
| 125                   | 78.82      | 5.32  | 18.60   | 6.86  | 0.0020  |
| 62.5                  | 36.55      | 1.21  | 13.01   | 5.19  | 0.0182  |
| 0                     | 0.000      | 0.000 | 0.000   | 0.000 |         |

**Table S12 Initial reaction rates of nitrocefin substrate turnover by TEM-1  $\beta$ -lactamase in polypropylene microtiter plate wells.** Substrate turnover was monitored as absorbance increase with a TECAN Infinite 200 Pro at 492 nm in 10 second intervals. Initial reaction rates were calculated from the linear range of substrate turnover at different substrate concentrations. Each data point represents the mean  $\pm$  SD of three different experiments.

| Nitrocefin<br>[ $\mu$ M] | $V_0$      |       |         |       | p-value |
|--------------------------|------------|-------|---------|-------|---------|
|                          | PDMA on PP |       | control |       |         |
|                          | Mean       | SD    | Mean    | SD    |         |
| 750                      | 3.112      | 0.440 | 1.786   | 0.095 | 0.0232  |
| 625                      | 3.118      | 0.156 | 1.576   | 0.227 | 0.0055  |
| 500                      | 2.584      | 0.092 | 1.330   | 0.041 | 0.0037  |
| 375                      | 2.348      | 0.020 | 1.264   | 0.142 | 0.0045  |
| 250                      | 1.815      | 0.098 | 0.973   | 0.017 | 0.0046  |
| 125                      | 1.522      | 0.077 | 0.824   | 0.084 | 0.0168  |
| 62.5                     | 1.101      | 0.037 | 0.682   | 0.094 | 0.0307  |
| 0                        | 0.000      | 0.000 | 0.000   | 0.000 |         |

**Table S13 Initial reaction rates of nitrocefin substrate turnover by TEM-1  $\beta$ -lactamase in polycarbonate microtiter plate wells.** Substrate turnover was monitored as absorbance increase with a TECAN Infinite 200 Pro at 492 nm in 10 second intervals. Initial reaction rates were calculated from the linear range of substrate turnover at different substrate concentrations. Each data point represents the mean  $\pm$  SD of three different experiments.

| Nitrocefin<br>[ $\mu$ M] | $V_0$      |       |         |       | p-value |
|--------------------------|------------|-------|---------|-------|---------|
|                          | PDMA on PC |       | control |       |         |
|                          | Mean       | SD    | Mean    | SD    |         |
| 750                      | 2.179      | 0.206 | 0.847   | 0.197 | 0.0287  |
| 625                      | 2.076      | 0.037 | 1.085   | 0.107 | 0.0017  |
| 500                      | 1.967      | 0.043 | 0.859   | 0.092 | 0.0047  |
| 375                      | 1.477      | 0.096 | 0.694   | 0.024 | 0.0071  |
| 250                      | 1.288      | 0.061 | 0.659   | 0.019 | 0.0017  |
| 125                      | 1.005      | 0.026 | 0.445   | 0.043 | 0.0046  |
| 62.5                     | 0.614      | 0.047 | 0.262   | 0.010 | 0.0027  |
| 0                        | 0.000      | 0.000 | 0.000   | 0.000 |         |
